# Supplementary material for: Synthesis, antiribosomal and antibacterial activity of 4′-O-glycopyranosyl paromomycin aminoglycoside antibiotics
Source: Royal Society of Chemistry journal article supplement (doi:10.1039/c4md00119b), 2014-01-01
Supplement: c4md00119b1.pdf [file c4md00119b1.pdf]

Supplementary Information for

Synthesis, Antiribosomal and Antibacterial Activity

of 4'-*O*-Glycopyranosyl Paromomycin

Aminoglycoside Antibiotics

*Weiwei Chen,<sup>a</sup> Takahiko Matsushita,<sup>a</sup> Dimitri Shcherbakov,<sup>b</sup> Heithem Boukari,<sup>b</sup> Andrea Vasella,<sup>c,\*</sup> Erik C. Böttger,<sup>b,\*</sup> and David Crich<sup>a,\*</sup>*

a) Department of Chemistry, Wayne State University, Detroit, MI 48202, USA

b) Institut für Medizinische Mikrobiologie, Universität Zürich, 8006 Zürich, Switzerland

c) Laboratorium für Organische Chemie, ETH Zürich, 8093 Zürich, Switzerland

[vasella@org.chem.ethz.ch](mailto:vasella@org.chem.ethz.ch); [dcrich@chem.wayne.edu](mailto:dcrich@chem.wayne.edu); [boettger@imm.uzh.ch](mailto:boettger@imm.uzh.ch)

**4'-O-(2''',3''',4''',6'''-Tetra-O-benzyl- $\alpha$ -D-glucopyranosyl)-1,3,2', 2''',6''-pentaazido-6,3',6',2'',5'',3''',4'''-hepta-O-benzyl-1,3,2',2''',6''-pentadeamino paromomycin (16 $\alpha$ ) and 4'-O-(2''',3''',4''',6'''-Tetra-O-benzyl- $\beta$ -D-glucopyranosyl)-1,3,2', 2''',6''-pentaazido-6,3',6',2'',5'',3''',4'''-hepta-O-benzyl-1,3,2',2''',6''-pentadeamino paromomycin (16 $\beta$ ).**

Compounds **16 $\alpha$**  (221 mg), **16 $\beta$**  (69 mg) were prepared from **11**<sup>1</sup> (500 mg) by the general glycosylation procedure, which was conducted at -60 °C for 1 h and then at -50 °C for 1 h before quenching with saturated aqueous NaHCO<sub>3</sub>. The pure anomers were isolated in the form of white gums by with gradient chromatography over silica gel (toluene:EtOAc 98:2 to 95:5) followed by preparative HPLC over silica gel (Agilent dynamax 250\*21.4 mm SI, Hexane: EtOAc 90:10, 21.5 ml/min) in a  $\alpha$ : $\beta$  ratio of 3.2: 1 and a combined yield of 42%.

**16 $\alpha$** : [ $\alpha$ ]<sub>D</sub><sup>RT</sup> +71.7 (*c* 4.20, CHCl<sub>3</sub>); <sup>1</sup>H NMR (600 MHz, CDCl<sub>3</sub>)  $\delta$  7.50-7.00 (m, 55H, aromatic), 6.11 (d, *J* = 4.03 Hz, 1 H: H1'), 5.64 (d, *J* = 5.5 Hz, 1 H: H1''), 5.44 (d, *J* = 2.94 Hz, 1 H: H1'''), 4.95 (m, 22 H: PhCH<sub>2</sub>), 4.56 (s, 1 H, H1'''), 4.30 (s, 1 H: H4''), 4.29 (s, 1 H: H3''), 4.22 (d, *J* = 9.9 Hz, 1 H: H5'), 4.12 (t, *J* = 9.35 Hz, 1 H: H3'), 4.00-3.90 (m, 5 H: H2'', H3''', H6', H4', H5), 3.83 (d, *J* = 10.64, 1 H: H5'''), 3.81-3.75 (m, 4 H: H6', H5'', H5''', H3'''), 3.69 (t, *J* = 9.17 Hz, 1 H: H4), 3.66-3.60 (m, 2 H: H6''', H4'''), 3.55 - 3.60 (m, 2 H: H5'', H6'''), 3.40 - 3.51 (m, 4 H: H2''', H6''', H3, H1), 3.36 (s, 1 H: H2'''), 3.25 (t, *J* = 9.35 Hz, 1 H: H6), 3.16 (s, 1 H: H4'''), 3.11 (dd, *J* = 3.9 Hz, 9.8 Hz, 1 H: H2'), 2.92 (dd, *J* = 4.2 Hz, 12.8 Hz, 1 H: H6''), 2.24 (dt, *J* = 4.5 Hz, 8.6 Hz, 1 H: H2<sub>eq</sub>), 1.31-1.41 (m, 1 H: H2<sub>ax</sub>). <sup>13</sup>C NMR (600 MHz, CDCl<sub>3</sub>)  $\delta$  106.27 (C1''), 98.57 (C1'''), 97.47 (C1'''), 95.99 (C1'), 83.95 (C6), 82.17 (C2''), 81.91 (C4''), 81.89 (C3'''), 81.86 (C5), 79.80 (C3'), 79.59 (C2'''), 77.61 (C4'''), 75.53 (C3''), 75.44 (C4), 74.26 (C4'), 73.67 (C5'''), 71.49 (C5'), 71.10 (C5'''), 70.88 (C3'''), 70.15 (C6'), 69.34 (C5''), 68.41 (C6'''), 62.78 (C2'), 60.38 (C1), 59.90 (C3), 57.33 (C2''), 51.03 (C6''), 32.38 (C2); PhCH<sub>2</sub> (11C: 75.31, 75.00, 74.90, 73.39, 73.23, 73.14, 73.07, 72.91, 72.85, 72.40, 71.74). HRESIMS calcd for C<sub>106</sub>H<sub>111</sub>N<sub>15</sub>O<sub>19</sub>Na [M+Na]<sup>+</sup>, 1920.8078; found, 1920.8175.

**16 $\beta$** : [ $\alpha$ ]<sub>D</sub><sup>RT</sup> +60.3 (*c* 0.80, CHCl<sub>3</sub>); <sup>1</sup>H NMR (600 MHz, CDCl<sub>3</sub>)  $\delta$  7.70-7.00 (m, 55H, aromatic), 6.09 (d, *J* = 4.03 Hz, 1 H: H1'), 5.62 (d, *J* = 5.50 Hz, 1 H: H1''), 5.13-4.22 (m, 22 H: PhCH<sub>2</sub>), 4.82 (s, 1 H: H1'''), 4.38 (m, 1H: H1'''), 4.24 (s, 1 H: H4''), 4.20 (s, 1 H, H3''), 4.13 (m, *J* = 9.9 Hz, 1 H: H5'), 3.97-4.12 (m, 2 H: H3', H4'), 3.81-3.96 (m, 3 H: H6', H2'', H5), 3.59-3.73 (m, 5

H: H6''', H5'', H3''', H6', H5'''), 3.65 (t,  $J = 11.2$  Hz, 1H: H4), 3.61 (t,  $J = 9.35$  Hz, 1 H: H4'''), 3.49-3.56 (m, 4 H: H6''', H5'', H3''', H6'''), 3.34-3.46 (m, 3 H: H3, H2''', H1), 3.30 (m, 1 H: H5'''), 3.34 (s, 1 H: H2'''), ) 3.22 (t,  $J = 9.35$  Hz, 1 H: H6), 3.12 (m, 1 H: H2'), 3.10 (s, 1 H: H4'''), 2.86-2.92 (dd,  $J = 4.4$  Hz, 13.2 Hz, 1 H: H6'''), 2.18 (dt,  $J = 4.5$  Hz, 8.6 Hz, 1 H: H2<sub>eq</sub>), 1.27-1.34 (m, 1 H: H2<sub>ax</sub>). <sup>13</sup>C NMR (600 MHz, CDCl<sub>3</sub>)  $\delta$  105.99 (C1'), 102.87 (C1'''), 98.66 (C1'''), 95.84 (C1'), 84.71 (C3'''), 84.05 (C6), 82.61 (C2'''), 82.23 (C4'), 81.97 (C2''), 81.70 (C5), 77.99 (C4'''), 77.50 (C3'), 77.21 (C4'), 75.59 (C3'''), 75.17 (C5'''), 74.72 (C4), 74.09 (C5'''), 73.08 (C3'''), 71.71 (C5'), 69.86 (C6'''), 69.00 (C5''), 67.96 (C6'), 62.62 (C2'), 60.34 (C1), 60.19 (C3), 57.30 (C2'''), 50.89 (C6''), 32.64 (C2); PhCH<sub>2</sub> (11C: 75.55, 75.10, 75.01, 74.90, 74.83, 73.23, 73.21, 72.90, 72.35, 71.41, 70.99). HRESIMS calcd for C<sub>106</sub>H<sub>111</sub>N<sub>15</sub>O<sub>19</sub>Na [M+Na]<sup>+</sup>, 1920.8078; found, 1920.8156.

**4'-O-(4''',6'''-O-Benzylidene-2''',3'''-O-benzyl- $\alpha$ -D-mannopyranosyl)-1,3,2',2'',6''-pentaazido-6,3',6',2'',5'',3''',4'''-hepta-O-benzyl-1,3,2',2'',6'''-pentadeamino paromomycin (17 $\alpha$ ) and 4'-O-(4''',6'''-O-Benzylidene-2''',3'''-O-benzyl- $\beta$ -D-mannopyranosyl)-1,3,2',2'',6''-pentaazido-6,3',6',2'',5'',3''',4'''-hepta-O-benzyl-1,3,2',2'',6'''-pentadeaminoparomomycin (17 $\beta$ ).** Compounds **17 $\alpha$**  (76 mg), **17 $\beta$**  (272 mg) were prepared from **11**<sup>1</sup> (520 mg) by the general glycosylation procedure. The glycosylation reaction was conducted at -60 °C for 2 h and then gradually increased to room temperature before quenching by saturated aqueous NaHCO<sub>3</sub>. The pure anomers were isolated in the form of white gums by gradient chromatography over silica gel (toluene:EtOAc 98:2 to 94:6) followed by preparative reverse phase-HPLC (Varian dynamax 250\*21.4 mm C<sub>18</sub>, acetonitrile:H<sub>2</sub>O 50:50 to 100:0, 21.5 ml/min) in a  $\alpha$ : $\beta$  ratio of 1: 3.6 with a total yield of 51%.

**17 $\alpha$** : [ $\alpha$ ]<sub>D</sub><sup>RT</sup> -27.3 ( $c$  0.21, CHCl<sub>3</sub>); <sup>1</sup>H NMR (600 MHz, CDCl<sub>3</sub>)  $\delta$  7.50-7.00 (m, 50H, aromatic), 6.15 (d,  $J = 3.7$  Hz, 1 H: H1'), 5.63 (d,  $J = 5.9$  Hz, 1 H: H1''), 5.61 (s, 1 H: PhCH), 5.23 (s, 1H: H1'''), 4.30-4.94 (m, 16 H: PhCH<sub>2</sub>), 4.86 (s, 1 H: H1'''), 4.21-4.27 (m, 4 H: H4'', H4''', H3'', PhCH<sub>2</sub>), 4.08-4.11 (m, 2 H: H6''', PhCH<sub>2</sub>), 4.05-4.10 (d,  $J = 9.9$  Hz, 1 H: H5'), 3.97 (t,  $J = 9.2$  Hz, 1 H: H3'), 3.90-3.94 (m, 3 H: H2'', H3''', H5), 3.84-3.87 (m, 1 H: H5'''), 3.78 (t,  $J = 9.9$  Hz, 1 H: H6'''), 3.74-3.80 (m, 6 H: H5'', H6', H6', H2''', H5'', H3'''), 3.66-3.70 (m, 2 H: H4', H4), 3.62 (dd,  $J = 8.4$  Hz, 12.9 Hz, 1 H: H6''), 3.55 (dd,  $J = 3.3$  Hz, 10.3 Hz, 1 H: H5''), 3.39-3.50 (m,

2 H: H3, H1), 3.33 (s, 1 H: H2'''), 3.22 (t,  $J = 9.5$  Hz, 1 H: H6), 3.11 (s, 1 H: H4'''), 2.93 (dd,  $J = 3.7$  Hz, 10.3 Hz, 1 H: H2'), 2.90 (d,  $J = 4.0$  Hz, 12.8 Hz, 1 H: H6'''), 2.20-2.24 (dt,  $J = 4.8$  Hz, 13.2 Hz, 1 H: H2<sub>eq</sub>), 1.34 (m, 1 H: H2<sub>ax</sub>). <sup>13</sup>C NMR (125 MHz, CDCl<sub>3</sub>)  $\delta$  106.24 (C1'), 101.40 (PhCH), 101.29 (C1'''), 98.64 (C1''), 95.84 (C1'), 84.14 (C6), 82.28 (C5), 82.05 (C4''), 81.96 (C2''), 79.94 (C3'), 78.99 (C4'''), 77.96 (C2'''), 77.76 (C4'), 76.27 (C3'''), 75.51 (C3''), 75.08 (C4), 74.31 (C5'''), 72.89 (C3'''), 71.48 (C4'''), 70.61 (C5'), 70.16 (C5''), 69.25 (C6'), 68.68 (C6'''), 65.32 (C5'''), 62.86 (C2'), 60.45 (C1), 60.27 (C3), 57.29 (C2'''), 51.07 (C6'''), 32.12 (C2); PhCH<sub>2</sub> (9C: 74.88, 74.82, 74.11, 73.93, 73.36, 73.25, 73.16, 72.40, 71.73). HRESIMS calcd for C<sub>99</sub>H<sub>103</sub>N<sub>15</sub>O<sub>19</sub>Na [M+Na]<sup>+</sup> 1828.7452; found, 1828.7511.

**17β**: [ $\alpha$ ]<sub>D</sub><sup>RT</sup> +63.0 ( $c$  0.33, CHCl<sub>3</sub>); <sup>1</sup>H NMR (600 MHz, CDCl<sub>3</sub>)  $\delta$  7.70-7.00 (m, 50H, aromatic), 6.20 (d,  $J = 4.0$  Hz, 1 H: H1'), 5.70 (d,  $J = 5.9$  Hz, 1 H: H1''), 5.54 (s, 1 H: PhCH), 4.39-5.19 (m, 16 H: PhCH<sub>2</sub>), 4.95 (s, 1 H: H1'''), 4.45 (m, 1H: H1'''), 4.32-4.35 (m, 2 H: H4'', PhCH<sub>2</sub>), 4.27-4.29 (d,  $J = 12.1$  Hz, PhCH<sub>2</sub>), 4.26 (br s, 1 H, H3''), 4.17-4.20 (m,  $J = 9.9$  Hz, 1 H: H5'), 4.03 - 4.14 (m, 3 H: H4''', H6''', H3'), 3.94-4.03 (m, 3 H: H4', H2'', H5), 3.71 - 3.81 (m, 6 H: H5''', H2''', H5'', H3''', H4, H5'''), 3.67-3.70 (d,  $J = 11.3$  Hz, 1H: H6'), 3.58-3.63 (m, 2 H: H5'', H6'''), 3.50-3.55 (dt,  $J = 3.8$  Hz, 10.3 Hz, 1 H: H3), 3.42-3.49 (m, 2 H: H6''', H1), 3.39 (dd,  $J = 0.7$  Hz, 9.9 Hz, 1 H: H3'''), 3.36 (br s, 1 H: H2'''), 3.29-3.34 (t,  $J = 9.2$  Hz, 1 H: H6), 3.24-3.28 (dd,  $J = 4.0$  Hz, 10.3 Hz, 1 H: H2'), 3.15 (br s, 1 H: H4'''), 3.07-3.11 (dt,  $J = 4.8$  Hz, 9.6 Hz, 1 H: H5'''), 2.92-2.95 (dd,  $J = 4.4$  Hz, 13.2 Hz, 1 H: H6'''), 2.26 (dt,  $J = 4.5$  Hz, 8.6 Hz, 1 H: H2<sub>eq</sub>), 1.41 (m, 1 H: H2<sub>ax</sub>). <sup>13</sup>C NMR (151 MHz, CDCl<sub>3</sub>)  $\delta$  106.17 (C1'), 101.71 (C1'''), 101.33 (PhCH), 98.71 (C1''), 95.81 (C1'), 84.14 (C6), 82.35 (C4''), 82.10 (C5), 81.86 (C2''), 78.53 (C3'), 78.15 (C4'''), 77.92 (C3'''), 77.49 (C4'), 76.70 (C2'''), 75.63 (C3'), 74.99 (C4), 73.74 (C5'''), 73.48 (C3'''), 71.46 (C4'''), 70.66 (C5'), 70.03 (C5''), 68.61 (C6'''), 68.49 (6'), 67.38 (C5'''), 62.60 (C2'), 60.39 (C1), 60.31 (C3), 57.34 (C2'''), 51.00 (C6'''), 32.72 (C2); PhCH<sub>2</sub> (9C: 75.10, 75.05, 74.98, 74.21, 73.30, 72.94, 72.42, 72.25, 71.76). HRESIMS calcd for C<sub>99</sub>H<sub>103</sub>N<sub>15</sub>O<sub>19</sub>Na [M+Na]<sup>+</sup> 1828.7452; found, 1828.7444.

**4'-O-(2''',3''',4''',6'''-Tetra-O-benzyl- $\alpha$ -D-galactopyranosyl)-1,3,2', 2''',6''-pentaazido-6,3',6',2'',5'',3'',4'''-hepta-O-benzyl-1,3,2',2''',6'''-pentadeamino paromomycin (18 $\alpha$ ) and 4'-O-(2''',3''',4''',6'''-Tetra-O-benzyl- $\beta$ -D-galactopyranosyl)-1,3,2', 2''',6''-pentaazido-**

**6,3',6',2'',5'',3''',4''''-hepta-*O*-benzyl-1,3,2',2''',6''''-pentadeamino paromomycin (18β).**

Compounds **18α** (358 mg), **18β** (56 mg) were prepared from **11**<sup>1</sup> (500 mg) by the general glycosylation procedure, which was conducted at -72 °C for 2 h before quenching by saturated aqueous NaHCO<sub>3</sub>. The pure anomers were isolated as white gums by gradient chromatography over silica gel (toluene:EtOAc 98:2 to 94:6). The two anomers were obtained as white gums with a α:β ratio of 6.4: 1 with a total yield of 60%.

**18α:**  $[\alpha]_{\text{D}}^{\text{RT}} +82.97$  (*c* 6.33, CHCl<sub>3</sub>); <sup>1</sup>H NMR (600 MHz, CDCl<sub>3</sub>) δ 7.50-7.00 (m, 55H, aromatic), 6.12 (d, *J* = 4.03 Hz, 1 H: H1'), 5.66 (d, *J* = 5.50 Hz, 1 H: H1''), 5.54 (d, *J* = 3.67 Hz, 1 H: H1'''), 4.91-4.34 (m, 21 H: PhCH<sub>2</sub>), 4.88-4.91 (br s, 1 H, H1'''), 4.31-4.30 (m, 3 H: H4'', H3'', PhCH<sub>2</sub>), 4.22-4.27 (dd, *J* = 3.3 Hz, 9.9 Hz, 1 H: H5'), 4.11 (t, *J* = 10.27 Hz, 1 H: H3'), 4.02-4.04 (dd, *J* = 3.45 Hz, 10.30 Hz, 1 H: H2'''), 4.01-3.98 (m, 2 H: H5''', H2''), 3.96-3.98 (br s, 1 H: H4'''), 3.85-3.96 (m, 4 H: H3''', H5, H6', H4'), 3.76-3.84 (m, 4 H: H6', H5'', H3'', H5'''), 3.73 (t, *J* = 9.35 Hz, 1 H: H4), 3.65 (dd, *J* = 8.44 Hz, 12.84 Hz, 1 H: H6'''), 3.57-3.62 (dd, *J* = 3.11 Hz, 10.27 Hz, 1 H: H5''), 3.50-3.55 (m, 2 H: H6'''), 3.41-3.50 (m, 2 H: H3, H1), 3.36-3.41 (br s, 1 H: H2''), 3.27 (t, *J* = 9.35 Hz, 1 H: H6), 3.14-3.18 (s, 1 H: H4''), 3.09 (dd, *J* = 3.67 Hz, 10.27 Hz, 1 H: H2'), 2.95 (dd, *J* = 4.2 Hz, 13.02 Hz, 1 H: H6'''), 2.24 (dt, *J* = 4.5 Hz, 8.6 Hz, 1 H: H2<sub>eq</sub>), 1.33-1.39 (m, 1 H: H2<sub>ax</sub>). <sup>13</sup>C NMR (151 MHz, CDCl<sub>3</sub>) δ 120-144 (55C: aromatic), 106.27 (C1''), 98.63 (C1'''), 98.22 (C1'''), 95.91 (C1'), 84.01 (C6), 82.24 (C2''), 81.96 (C4''), 81.94 (C3''), 79.94 (C3'), 78.87 (C5), 75.97 (C2'''), 75.53 (C3''), 75.28 (C4), 75.09 (C4'), 75.07 (C4'''), 74.28 (C5'''), 72.98 (C3'''), 71.57 (C4'''), 70.82 (C5'), 70.16 (C5''), 70.14 (C5'''), 69.73 (C6'), 69.08 (C6'''), 62.92 (C2'), 60.42 (C1), 60.00 (C3), 57.38 (C2''), 51.05 (C6'''), 32.46 (C2); PhCH<sub>2</sub> (11C: 74.94, 74.72, 73.80, 73.38, 73.30, 73.28, 73.19, 72.93, 72.89, 72.43, 71.79). HRESIMS calcd for C<sub>106</sub>H<sub>111</sub>N<sub>15</sub>O<sub>19</sub>Na [M+Na]<sup>+</sup>, 1920.8078; found, 1920.8009.

**18β:**  $[\alpha]_{\text{D}}^{\text{RT}} +42.37$  (*c* 3.25, CHCl<sub>3</sub>); <sup>1</sup>H NMR (600 MHz, CDCl<sub>3</sub>) δ 7.50-7.00 (m, 55H, aromatic), 6.12 (d, *J* = 3.7 Hz, 1 H: H1'), 5.65 (d, *J* = 5.9 Hz, 1 H: H1''), 5.14-4.23 (m, 22 H: PhCH<sub>2</sub>), 4.81 (s, 1 H: H1'''), 4.38 (d, *J* = 7.0 Hz, 1H: H1'''), 4.20-4.27 (m, 3 H: H4'', H5', H3''), 4.03-4.07 (t, *J* = 9.2 Hz, 1 H: H3'), 3.99-4.02 (t, *J* = 9.2 Hz, 1 H: H4'), 3.90 - 3.98 (m, 4 H: H6', H2'', H5, H5'''), 3.82 (dd, *J* = 9.9, 7.7 Hz, 1 H: H2'''), 3.66 - 3.79 (m, 5 H: H4, H5'', H3''', H6', H5'''), 3.52-3.58 (m, 3 H: H6''', H5'', H6'''), 3.42-3.50 (m, 2 H: H3, H1), 3.40 (dd, *J* = 3.0 Hz, 9.9 Hz,

1 H: H3'''), 3.33-3.37 (m, 2 H: H4''', H6'''), 3.32 (br s, 1 H: H2''), 3.24-3.27 (t,  $J = 9.5$  Hz, 1 H: H6), 3.18-3.23 (dd,  $J = 4.8$  Hz, 12.8 Hz, 1H: H2'), 3.10-3.15 (br s, 1H: H4'''), 2.93 (dd,  $J = 4.8$  Hz, 12.8 Hz, 1 H: H6'''), 2.24 (dt,  $J = 4.5$  Hz, 8.6 Hz, 1 H: H2<sub>eq</sub>), 1.30-1.40 (m, 1 H: H2<sub>ax</sub>). <sup>13</sup>C NMR (151 MHz, CDCl<sub>3</sub>)  $\delta$  120-144 (55C: aromatic), 106.04 (C1''), 103.08 (C1'''), 98.68 (C1'''), 95.78 (C1'), 84.06 (C6), 82.29 (C5), 82.26 (C3'''), 82.00 (C4''), 81.76 (C2''), 79.95 (C2'''), 78.09 (C3'), 76.65 (C4'), 75.63 (C3''), 74.75 (C4), 74.10 (C5'''), 73.81 (C5'''), 73.14 (C4'''), 72.99 (C3'''), 71.07 (C5'), 69.92 (C5''), 68.13 (C6'''), 68.06 (C6'), 62.74 (C2'), 60.20 (C1), 60.03 (C3), 57.34 (C2'''), 50.91 (C6'''), 32.65 (C2), PhCH<sub>2</sub> (11C: 75.35, 75.27, 75.01, 74.80, 73.37, 73.26, 73.24, 72.91, 72.69, 72.39, 71.76). HRESIMS calcd for C<sub>106</sub>H<sub>111</sub>N<sub>15</sub>O<sub>19</sub>Na [M+Na]<sup>+</sup>, 1920.8078; found, 1920.8101.

**4'-O-(2''',3''',6'''-Tri-O-benzyl-4'''-azido-4'''-deoxy- $\alpha$ -D-glucopyranosyl)-1,3,2',2'',6''-pentaazido-6,3',6',2'',5'',3''',4'''-hepta-O-benzyl-1,3,2',2'',6'''-pentadeamino paromomycin (19 $\alpha$ )** and **4'-O-(2''',3''',6'''-Tri-O-benzyl-4'''-azido-4'''-deoxy- $\beta$ -D-glucopyranosyl)-1,3,2',2'',6''-pentaazido-6,3',6',2'',5'',3''',4'''-hepta-O-benzyl-1,3,2',2'',6'''-pentadeamino paromomycin (19 $\beta$ )**. Compounds **19 $\alpha$**  (272 mg), **19 $\beta$**  (61 mg) were prepared from **11**<sup>1</sup> (500 mg) by the general glycosylation procedure conducted at -60 °C for 1 h and then -50 °C for 1 h before quenching by saturated aqueous NaHCO<sub>3</sub>. The two anomers were isolated as white gums by gradient chromatography over silica gel (toluene:EtOAc 98:2 to 94:6) followed by to preparative reverse phase HPLC ((Varian dynamax 250\*21.4 mm C<sub>18</sub>, acetonitrile:H<sub>2</sub>O 70:30 to 100:0, 21.5 ml/min)) in a  $\alpha$ : $\beta$  ratio of 4.5: 1 with a total yield of 50%.

**19 $\alpha$** : [ $\alpha$ ]<sub>D</sub><sup>RT</sup> +93.21 ( $c$  3.73, CHCl<sub>3</sub>); <sup>1</sup>H NMR (600 MHz, CDCl<sub>3</sub>)  $\delta$  7.50-7.00 (m, 50H, aromatic), 6.10 (d,  $J = 4.0$  Hz, 1 H: H1'), 5.61 (d,  $J = 5.5$  Hz, 1 H: H1''), 5.41 (d,  $J = 3.7$  Hz, 1 H: H1'''), 4.94-4.30 (m, 19 H: PhCH<sub>2</sub>), 4.85 (s, 1 H, H1'''), 4.24-4.29 (m, 3 H: H4'', H3'', PhCH<sub>2</sub>), 4.14-4.20 (d,  $J = 9.9$  Hz, 1 H: H5'), 4.07-4.13 (t,  $J = 9.2$  Hz, 1 H: H3'), 3.94-3.96 (t,  $J = 5.1$  Hz, 1 H: H2''), 3.90-3.93 (m, 3 H: H4', H5, H6'), 3.82 (t,  $J = 9.4$  Hz, 1 H: H3'''), 3.74-3.78 (m, 3 H: H5'', H3''', H5'''), 3.73 (t,  $J = 8.4$  Hz, 1 H: H6'), 3.67 (t,  $J = 9.5$  Hz, 1 H: H4), 3.59-3.63 (m, 3 H: H6''', H4''', H5'''), 3.55 (dd,  $J = 3.3$  Hz, 10.3 Hz, 1 H: H5''), 3.39-3.49 (M, 5 H: H3, H6''', H2''', H6''', H1), 3.32-3.36 (br s, 1 H: H2''), 3.24 (t,  $J = 9.4$  Hz, 1 H: H6), 3.11-3.15 (br s, 1 H: H4'''), 3.08 (dd,  $J = 10.1, 3.9$  Hz, 1 H: H2'), 2.91 (dd,  $J = 13.0, 4.2$  Hz, 1 H: H6'''), 2.24 (dt,  $J = 4.5$  Hz,

8.6 Hz, 1 H: H<sub>2eq</sub>), 1.30-1.39 (m, 1 H: H<sub>2ax</sub>). <sup>13</sup>C NMR (151 MHz, CDCl<sub>3</sub>) δ 120-144 (55C: aromatic), 106.30 (C1'), 98.57 (C1'''), 97.26 (C1'''), 95.96 (C1'), 81.89 (C5), 79.76 (C3'''), 79.69 (C3'), 79.42 (C2'''), 77.21 (C6), 76.99 (C2'), 76.78 (C4'), 75.53 (C3''), 75.36 (C4), 74.25 (C4'), 72.39 (C3'''), 71.52 (C4'''), 70.84 (C5'), 70.19 (C4'''), 70.14 (C5''), 69.20 (C6'), 68.51 (C6'''), 62.66 (C2'), 61.60 (C4'''), 60.38 (C1), 60.03 (C3), 57.32 (C2'''), 51.04 (C6'''), 32.45 (C2); PhCH<sub>2</sub> (10C: 75.44, 75.01, 74.61, 73.39, 73.21, 73.17, 73.11, 72.93, 72.75, 71.75). HRESIMS calcd for C<sub>99</sub>H<sub>104</sub>N<sub>18</sub>O<sub>18</sub>Na [M+Na]<sup>+</sup>, 1855.7674; found, 1855.7692.

**19β**: [α]<sub>D</sub><sup>RT</sup> +78.7 (*c* 1.87, CHCl<sub>3</sub>); <sup>1</sup>H NMR (600 MHz, CDCl<sub>3</sub>) δ 7.50-7.00 (m, 50H, aromatic), 6.12 (d, *J* = 4.0 Hz, 1 H: H1'), 5.63 (d, *J* = 5.9 Hz, 1 H: H1''), 5.09-4.29 (m, 21 H: PhCH<sub>2</sub>), 4.80 (s, 1 H: H1'''), 4.32 (d, *J* = 7.7 Hz, 1H: H1'''), 4.24-4.26 (m, 2 H: H4'', PhCH<sub>2</sub>), 4.20 (m, H3''), 4.18 (d, *J* = 9.5 Hz, 1 H: H5'), 4.01 (m, 2 H: H3', H4'), 3.88-3.96 (m, 3 H: H6', H2'', H5), 3.68-3.76 (m, 4 H: H5'', H3''', H5''', H6'), 3.65-3.67 (m, 2 H: H4, H6'''), 3.60 (t, *J* = 9.9 Hz, 1 H: H4'''), 3.52-3.59 (m, 2 H: H6''', H5''), 3.48 (dd, *J* = 4.4 Hz, 11.0 Hz, 1 H: H6'''), 3.39-3.43 (m, 2 H: H1, H3), 3.37 (t, *J* = 8.4 Hz, 1 H: H2'''), 3.31 (br s, 1 H: H2''), 3.27 (t, *J* = 9.2 Hz, 1 H: H3'''), 3.24 (t, *J* = 9.5 Hz, 1 H: H6), 3.13 (dd, *J* = 4.0 Hz, 9.9 Hz), 3.11 (br s, 1 H: H4'''), 3.02 (ddd, *J* = 1.5 Hz, 4.0 Hz, 6.2 Hz, 1 H: H5'''), 2.91 (dd, *J* = 4.4 Hz, 12.8 Hz, 1 H: H6'''), 2.24 (dt, *J* = 4.5 Hz, 8.6 Hz, 1 H: H2<sub>eq</sub>), 1.29-1.36 (m, 1 H: H2<sub>ax</sub>). <sup>13</sup>C NMR (151 MHz, CDCl<sub>3</sub>) δ 120-144 (50C: aromatic), 106.04 (C1'), 102.71 (C1''), 98.66 (C1'''), 95.89 (C1'), 84.05 (C6), 82.77 (C3'''), 82.26 (C2'', C2'''), 81.99 (C4''), 81.73 (C5), 77.79 (C3'), 77.02 (C4'), 76.77 (C3''), 74.82 (C4), 74.11 (C5'''), 74.07 (C5''), 72.91 (C3'''), 71.43 (C4'''), 70.90 (C5'), 69.89 (C5''), 69.16 (C6'''), 67.88 (C6'), 62.64 (C2'), 62.08 (C4'''), 60.35 (C1), 60.19 (C3), 57.31 (C2'''), 50.92 (C6'''), 32.64 (C2), PhCH<sub>2</sub> (10C: 76.77, , 75.19, 75.03, 74.87, 73.31, 73.24, 73.21, 72.91, 72.37, 71.73). HRESIMS calcd for C<sub>99</sub>H<sub>104</sub>N<sub>18</sub>O<sub>18</sub>Na [M+Na]<sup>+</sup>, 1855.7674; found, 1855.7615.

**4'-O-(2''',3''',4''',6'''-Tetra-O-benzyl-α-D-glucopyranosyl)-6,3',6',2'',5'',3''',4'''-hepta-O-benzyl-1,3,2',2''',6'''-pentadeamino paromomycin (20a)**. Compound **20a** (35 mg, 64%) was obtained as a white gum by the Staudinger reaction of **16a** (60 mg) after silica gel chromatography (NH<sub>4</sub>OH: MeOH 0: 100 to 1:99). [α]<sub>D</sub><sup>RT</sup> +27.50 (*c* 2.00, MeOH); HRESIMS calcd for C<sub>106</sub>H<sub>122</sub>N<sub>5</sub>O<sub>19</sub> [M+H]<sup>+</sup>, 1768.8734; found, 1768.8747. This compound was taken forward to the next step without further characterization.

**4'-O-(2''',3''',4''',6'''-Tetra-O-benzyl- $\beta$ -D-glucopyranosyl)-6,3',6',2'',5'',3''',4'''-hepta-O-benzyl-1,3,2',2'',6'''-pentadeamino paromomycin (20 $\beta$ ).** Compound **20 $\beta$**  (17 mg, 55%) was obtained as a white gum by Staudinger reaction of **16 $\beta$**  (33 mg) after silica gel chromatography (NH<sub>4</sub>OH: MeOH 0: 100 to 1:99).  $[\alpha]_D^{RT}$  -2.1 (*c* 0.52, MeOH); HRESIMS calcd for C<sub>106</sub>H<sub>122</sub>N<sub>5</sub>O<sub>19</sub> [M+H]<sup>+</sup>, 1768.8734; found, 1768.8700. This compound was taken forward to the next step without further characterization.

**4'-O-(4''',6'''-O-Benzylidene-2''',3'''-O-benzyl- $\alpha$ -D-mannopyranosyl)-6, 3',6',2'',5'',3''',4'''-hepta-O-benzyl-1,3,2',2'',6'''-pentadeamino paromomycin (21 $\alpha$ ).** Compound **21 $\alpha$**  (17 mg, 91%) was obtained in the form of a white gum from by Staudinger reaction **17 $\alpha$**  (20 mg) after silica gel chromatography (NH<sub>4</sub>OH: MeOH 0: 100 to 1:99) .  $[\alpha]_D^{RT}$  +10.2 (*c* 0.93, MeOH); HRESIMS calcd for C<sub>99</sub>H<sub>114</sub>N<sub>5</sub>O<sub>19</sub>[M+H]<sup>+</sup> , 1676.8108; found, 1676.8175. This compound was taken forward to the next step without further characterization.

**4'-O-(4''',6'''-O-Benzylidene-2''',3'''-O-benzyl- $\beta$ -D-mannopyranosyl)-6, 3',6',2'',5'',3''',4'''-hepta-O-benzyl-1,3,2',2'',6'''-pentadeamino paromomycin (21 $\beta$ ).** Compound **21 $\beta$**  (68 mg, 66%) was obtained in the form of a white gum by Staudinger reaction of 110 mg **17 $\beta$**  (110 mg) after silica gel chromatography (NH<sub>4</sub>OH: MeOH 0: 100 to 1:99) .  $[\alpha]_D^{RT}$  -5.5 (*c* 1.75, MeOH); HRESIMS calcd for C<sub>99</sub>H<sub>114</sub>N<sub>5</sub>O<sub>19</sub> [M+H]<sup>+</sup> , 1676.8108; found, 1676.8066. This compound was taken forward to the next step without further characterization.

**4'-O-(2''',3''',4''',6'''-Tetra-O-benzyl- $\alpha$ -D-galactopyranosyl)-6,3',6',2'',5'',3''',4'''-hepta-O-benzyl-1,3,2',2'',6'''-pentadeamino paromomycin (22 $\alpha$ ).** Compound **22 $\alpha$**  (83 mg, 81%) was obtained as a white gum by Staudinger reaction of 110 mg **18 $\alpha$**  (110 mg) after silica gel chromatography (NH<sub>4</sub>OH: MeOH 0: 100 to 1:99).  $[\alpha]_D^{RT}$  +42.7 (*c* 6.67, MeOH); HRESIMS calcd for C<sub>106</sub>H<sub>122</sub>N<sub>5</sub>O<sub>19</sub> [M+H]<sup>+</sup>, 1768.8734; found, 1768.8707. This compound was taken forward to the next step without further characterization.

**4'-O-(2''',3''',4''',6'''-Tetra-O-benzyl- $\beta$ -D-galactopyranosyl)-6,3',6',2'',5'',3''',4'''-hepta-O-benzyl-1,3,2',2'',6'''-pentadeaminoparomomycin (22 $\beta$ ).** Compound **22 $\beta$**  (24 mg, 78%) was obtained as a white gum by Staudinger reaction of **18 $\beta$**  (33 mg) after silica gel chromatography



(NH<sub>4</sub>OH: MeOH 0: 100 to 1:99).  $[\alpha]_D^{RT}$  -5.2 (*c* 0.56, MeOH); HRESIMS calcd for C<sub>106</sub>H<sub>122</sub>N<sub>5</sub>O<sub>19</sub> [M+H]<sup>+</sup>, 1768.8734; found, 1768.8732. This compound was taken forward to the next step without further characterization.

**4'-O-(2''',3''',6'''-Tri-O-benzyl-4'''-amino-4'''-deoxy- $\alpha$ -D-glucopyranosyl)-**

**6,3',6',2'',5'',3''',4'''-hepta-O-benzyl-1,3,2',2''',6'''-pentadeamino paromomycin (23 $\alpha$ ).**

Compound **23 $\alpha$**  (23 mg, 64%) was obtained as a white gum by Staudinger reaction of 40 mg **19 $\alpha$**  (40 mg) after silica gel chromatography (NH<sub>4</sub>OH: MeOH 0: 100 to 1:99).  $[\alpha]_D^{RT}$  +23.0 (*c* 0.80, MeOH); HRESIMS calcd for C<sub>99</sub>H<sub>117</sub>N<sub>6</sub>O<sub>18</sub> [M+H]<sup>+</sup>, 1677.8424; found, 1677.8425. This compound was taken forward to the next step without further characterization.

**4'-O-(2''',3''',6'''-Tri-O-benzyl-4'''-amino-4'''-deoxy- $\beta$ -D-glucopyranosyl)-**

**6,3',6',2'',5'',3''',4'''-hepta-O-benzyl-1,3,2',2''',6'''-pentadeamino paromomycin (23 $\beta$ ).**

Compound **23 $\beta$**  (18 mg, 48%) was obtained as a white gum by Staudinger reaction of **19 $\beta$**  (28 mg) after silica gel chromatography (NH<sub>4</sub>OH: MeOH 0: 100 to 1:99).  $[\alpha]_D^{RT}$  +5.9 (*c* 1.20, CHCl<sub>3</sub>); HRESIMS calcd for C<sub>99</sub>H<sub>117</sub>N<sub>6</sub>O<sub>18</sub> [M+H]<sup>+</sup>, 1677.8424; found, 1677.8474. This compound was taken forward to the next step without further characterization.

**4'-O- $\alpha$ -D-Glucopyranosyl paramomycin (24 $\alpha$ ).** Compound **24 $\alpha$**  (29 mg, 39%) was obtained as a white solid by hydrogenolysis of **20 $\alpha$**  (120 mg) after Sephadex chromatography.  $[\alpha]_D^{RT}$  +73.2 (*c* 0.50, H<sub>2</sub>O); <sup>1</sup>H NMR (600 MHz, CDCl<sub>3</sub>)  $\delta$  5.59 (d, *J* = 4.0 Hz, 1 H: H1'), 5.21 (d, *J* = 3.0 Hz, 1H: H1'''), 5.18 (br s, 1 H: H1''), 5.11 (s, 1 H: H1'''), 4.34 (t, *J* = 5.1 Hz, 1 H: H3'), 4.20 (s, 1 H: H2''), 4.12 (s, 1 H: H5'''), 4.00-4.05 (m, 3 H: H3''', H3', H4'), 3.79 (t, *J* = 8.8 Hz, 1 H: H5'), 3.63-3.76 (m, 7 H: H5'', H4, H5, H6''', H6', H6', H4'''), 3.55-3.60 (m, 3 H: H5'', H6''', H4'), 3.46-3.51 (m, 3 H: H3''', H5''', H6), 3.41-3.44 (dd, *J* = 3.7 Hz, 9.9 Hz, 1 H: H2'''), 3.40 (s, 1 H: H2''), 3.28 (dd, *J* = 4.0 Hz, 9.9 Hz, 1 H: H2'), 3.22-3.26 (m, 3 H: H4''', H6''', H3), 3.16 (dd, *J* = 4.0 Hz, 14.0 Hz, 1 H: H2'), 3.22-3.27 (m, 3 H: H3, H4''', H6'''), 3.16-3.19 (dd, *J* = 4.0 Hz, 14.0 Hz, 1 H: H6'''), 3.13 (dt, *J* = 3.6 Hz, 10.1 Hz, 1 H: H1), 2.23 (m, 1 H: H2<sub>eq</sub>), 1.60 (m, 1 H: H2<sub>ax</sub>). <sup>13</sup>C NMR (151 MHz, CDCl<sub>3</sub>)  $\delta$  109.98 (C1''), 99.44 (C1'''), 95.26 (C1', C1'''), 84.64 (C5), 81.07

(C4''), 79.22 (C4), 77.79 (C4'), 76.39 (C5'''), 74.98 (C3''), 73.28 (C2''), 72.86 (C3'''), 73.63 (C6), 72.01 (C5'), 70.38 (C2'''), 70.15 (C5'''), 67.99 (C3'), 67.62 (C3''), 67.19 (C4''), 66.52 (C4'''), 60.37 (C6'), 59.93 (C6''', C5''), 53.29 (C2'), 50.74 (C2'''), 49.78 (C1), 48.70 (C3), 40.29 (C6'''), 28.85 (C2), 23.05 (CH<sub>3</sub>). HRESIMS calcd for C<sub>29</sub>H<sub>56</sub>N<sub>5</sub>O<sub>19</sub> [M+H]<sup>+</sup>, 778.3570; found, 778.3594.

**4'-O-β-D-Glucopyranosyl paramomycin (24β).** Compound **24β** (9 mg, 87%) was obtained in the form of a white solid by hydrogenolysis of **20β** (17 mg) after Sephadex chromatography.  $[\alpha]_D^{RT} +30.0$  (*c* 0.45, H<sub>2</sub>O); <sup>1</sup>H NMR (600 MHz, CDCl<sub>3</sub>) δ 5.59 (d, *J* = 3.7 Hz, 1 H: H1'), 5.19 (d, *J* = 2.9 Hz, 1 H: H1''), 5.09 (s, 1H: H1'''), 4.34 (t, *J* = 6.6 Hz, 1 H: H3''), 4.31 (d, *J* = 8.1 Hz, 1 H: H1'''), 4.19 (br s, 1 H: H2''), 4.12 (t, *J* = 4.4 Hz, 1 H: H5'''), 4.03 (t, *J* = 3.3 Hz, 1 H: H3'''), 4.01(m, 1 H: H4'), 3.82 (t, *J* = 10.6 Hz, 1 H: H3'), 3.77 (m, 1 H: H5'''), 3.72-3.74 (m, 2 H: H6''', H5''), 3.68 (dd, *J* = 4.1 Hz, 12.4 Hz, 1 H: H6'''), 3.62-3.65 (m, 2 H: H5, H4'''), 3.59 (dd, *J* = 4.8 Hz, 12.5 Hz, 1 H: H5''), 3.52-3.57 (m, 4 H: H6', H4', H6', H6), 3.43 (t, *J* = 10.3 Hz, 1 H: H4), 3.37 (s, 1 H: H2'''), 3.31 (t, *J* = 9.1 Hz, 1 H: H3'''), 3.27 (dd, *J* = 2.4 Hz, 5.8 Hz, 1 H: H5'), 3.16-3.26 (m, 4 H: H6''', H4''', H2', H6'''), 3.11 (t, *J* = 9.2 Hz, 1 H: H2'''), 2.99-3.07 (m, 2 H: H1, H3), 2.10 (dt, *J* = 4.0 Hz, 12.5 Hz, 1 H: H2<sub>eq</sub>), 1.44 (m, 1 H: H2<sub>ax</sub>). <sup>13</sup>C NMR (151 MHz, CDCl<sub>3</sub>) δ 109.80 (C1''), 102.44 (C1'''), 95.80 (C1'), 95.44 (C1'''), 84.67 (C5), 81.03 (C4'), 79.94 (C6), 77.73 (C4'), 75.90 (C5'), 75.38 (C3'''), 74.99 (C3''), 73.25 (C2'''), 73.08 (C2''), 73.04 (C4), 72.14 (C5'''), 70.19 (C5'''), 69.33 (C4'''), 68.21 (C3'), 67.71 (C3''), 67.23 (C4'''), 60.46 (C5''), 59.96 (C6'), 59.93 (C6'''), 53.84 (C2'), 50.82 (C2'''), 50.12 (C1), 48.93 (C3), 40.30 (C6'''), 30.55 (C2), 23.12 (CH<sub>3</sub>). HRESIMS calcd for C<sub>29</sub>H<sub>56</sub>N<sub>5</sub>O<sub>19</sub> [M+H]<sup>+</sup>, 778.3570; found, 778.3537.

**4'-O-α-D-Mannopyranosyl paramomycin (25α).** Compound **25α** (4 mg, 33%) was obtained in the form of a white solid by hydrogenolysis of **21α** (17 mg) after Sephadex chromatography.  $[\alpha]_D^{RT} +55.0$  (*c* 0.18, H<sub>2</sub>O); <sup>1</sup>H NMR (600 MHz, CDCl<sub>3</sub>) δ 5.59 (d, *J* = 4.1 Hz, 1 H: H1'), 5.21 (br s, 1 H: H1''), 5.12 (s, 1 H: H1'''), 5.09 (m, 1H: H1'''), 4.37 (t, *J* = 5.5 Hz, 1 H: H3''), 4.23 (s, 1 H: H2''), 4.15 (s, 1 H: H5'''), 4.06 (s, 1 H: H3'''), 4.04 (s, 1 H: H4''), 3.92 (t, *J* = 8.8 Hz, 1 H: H3'), 3.88 (s, 1 H: H2'''), 3.63-3.79 (m, 7 H: H6''', H5'', H5', H6', H5, H6', H4''', H4), 3.54-3.63 (m, 4 H: H3''', H6''', H5'', H4'), 3.43-3.52 (m, 3 H: H5''', H4''', H6), 3.41 (s, 1 H: H2'''), 3.17-3.28 (m, 3 H: H6''', H6'', H2'), 3.09-3.15 (m, 2 H: H1, H3), 2.17 (m, 1 H: H2<sub>eq</sub>), 1.50 (m, 1 H: H2<sub>ax</sub>). <sup>13</sup>C NMR (151 MHz, CDCl<sub>3</sub>) δ 109.98 (C1''), 101.49 (C1'''), 95.64 (C1'), 95.27 (C1'''), 84.63 (C5),

81.01 (C4''), 79.02 (C4), 75.54 (C4'), 74.93 (C3''), 73.82 (C5'''), 73.27 (C6), 72.79 (C2''), 72.48 (C5'), 70.19 (C3'''), 70.16 (C5''), 69.98 (C2'''), 69.41 (C3'), 67.62 (C3'''), 67.20 (C4'''), 66.36 (C4'''), 60.80 (C6'''), 60.03 (C6'), 59.94 (C5''), 53.84 (C2'), 50.78 (C2'''), 50.00 (C1), 48.80 (C3), 40.29 (C6'''), 30.02 (C2), 22.95 (CH<sub>3</sub>). HRESIMS calcd for C<sub>29</sub>H<sub>56</sub>N<sub>5</sub>O<sub>19</sub> [M+H]<sup>+</sup>, 778.3570; found, 778.3600.

**4'-O-β-D-Mannopyranosyl paramomycin (25β).** Compound **25β** (11 mg, 33%) was obtained in the form of a white solid by hydrogenolysis of **21β** (68 mg) after Sephadex chromatography.  $[\alpha]_D^{RT} +31.9$  (*c* 0.54, H<sub>2</sub>O); <sup>1</sup>H NMR (600 MHz, CDCl<sub>3</sub>) δ 5.57 (d, *J* = 4.0 Hz, 1 H: H1'), 5.20 (br s, 1 H: H1''), 5.11 (s, 1 H: H1'''), 4.57 (s, 1H: H1'''), 4.35 (t, *J* = 5.5 Hz, 1 H: H3''), 4.20 (s, 1 H: H2''), 4.12 (s, 1 H: H5'''), 4.04 (s, 1 H: H3'''), 4.02 (s, 1 H: H4'), 3.87 (m, 2 H: H3', H2'''), 3.72-3.78 (m, 3 H: H6''', H5', H5''), 3.57-3.70 (m, 7 H: H6', H6', H5, H4''', H4, H5'', H4'), 3.52-3.55 (dd, *J* = 6.6 Hz, 12.1 Hz, 1 H: H6'''), 3.43-3.47 (m, 2 H: H3''', H6), 3.39 (s, 1 H: H2'''), 3.37 (t, *J* = 9.9 Hz, 1 H: H4'''), 3.16-3.28 (m, 4 H: H6'', H5''', H6'', H2'), 3.07-3.11 (m, 2 H: H1, H3), 2.15 (m, 1 H: H2<sub>eq</sub>), 1.49 (m, 1 H: H2<sub>ax</sub>). <sup>13</sup>C NMR (151 MHz, CDCl<sub>3</sub>) δ 109.87 (C1'), 99.96 (C1'''), 95.61 (C1'), 95.35 (C1'''), 84.64 (C5), 81.07 (C4''), 79.22 (C4), 77.79 (C4'), 76.39 (C5'''), 74.98 (C3''), 73.28 (C2''), 72.86 (C3'''), 73.63 (C6), 72.01 (C5'), 70.38 (C2'''), 70.15 (C5''), 67.99 (C3'), 67.62 (C3'''), 67.19 (C4'''), 66.52 (C4'''), 60.84 (C6'''), 59.91 (C5''), 59.56 (C6'), 53.61 (C2'), 50.76 (C2'''), 50.01 (C1), 48.83 (C3), 40.29 (C6'''), 30.01 (C2), 23.00 (CH<sub>3</sub>). HRESIMS calcd for C<sub>29</sub>H<sub>56</sub>N<sub>5</sub>O<sub>19</sub> [M+H]<sup>+</sup>, 778.3570; found, 778.3561.

**4'-O-α-D-Galactopyranosyl paramomycin (26α).** Compound **26α** (36 mg, 62%) was obtained as a white solid by hydrogenolysis of **22α** (100 mg) after Sephadex chromatography.  $[\alpha]_D^{RT} +9.2$  (*c* 0.45, H<sub>2</sub>O); <sup>1</sup>H NMR (600 MHz, CDCl<sub>3</sub>) δ 5.59 (s, 1 H: H1'), 5.20 (s, 1H: H1'''), 5.16 (s, 1 H: H1''), 5.09 (s, 1 H: H1'''), 4.32 (br s, 1 H: H3''), 4.19 (s, 1 H: H2''), 4.10 (s, 1 H: H5''), 3.98-4.05 (m, 3 H: H3''', H3', H4'), 3.80 (t, *J* = 10.3 Hz, 1 H: H4), 3.73-3.79 (m, 3 H: H5', H3''', H5'''), 3.65-3.72 (m, 5 H: H5'', H6''', H5, H2''', H6'''), 3.60-3.64 (m, 2 H: H4''', H4'''), 3.51-3.59 (m, 4 H: H6', H6', H5'', H4'), 3.48 (t, *J* = 9.5 Hz, 1 H: H6), 3.38 (s, 1 H: H2'''), 3.29-3.34 (m, 2 H: H3, H2'), 3.22 (m, 1 H: H6'''), 3.11-3.18 (m, 2 H: H6'', H1), 2.24-2.28 (m, 1 H: H2<sub>eq</sub>), 1.63 (m, 1 H: H2<sub>ax</sub>). <sup>13</sup>C NMR (151 MHz, CDCl<sub>3</sub>) δ 110.01 (C1'), 99.66 (C1'''), 95.30 (C1'''), 95.11 (C1'), 84.19 (C5), 81.22 (C4''), 77.43 (C4), 75.38 (C4'), 75.13 (C3''), 73.31 (C2''), 73.20 (C5'), 72.21

(C6), 71.89 (C5'''), 70.16 (C5''), 69.13 (C4'''), 69.06 (C3'''), 68.83 (C3'), 68.22 (C2'''), 67.56 (C3''), 67.19 (C4''), 61.15 (C6'), 60.03 (C5''), 59.97 (C6'''), 53.17 (C2'), 50.78 (C2''), 49.69 (C1), 48.68 (C3), 40.32 (C6''), 28.27 (C2), 22.59 (CH<sub>3</sub>). HRESIMS calcd for C<sub>29</sub>H<sub>56</sub>N<sub>5</sub>O<sub>19</sub> [M+H]<sup>+</sup>, 778.3570; found, 778.3577.

**4'-O-β-D-Galactopyranosyl paramomycin (26β).** Compound **26β** (5.5 mg, 39%) was obtained in the form of a white solid by hydrogenolysis of **22β** (24 mg) after Sephadex chromatography.  $[\alpha]_D^{RT} +38.7$  (c 0.37, H<sub>2</sub>O); <sup>1</sup>H NMR (600 MHz, CDCl<sub>3</sub>) δ 5.65 (s, 1 H: H1<sub>L</sub>), 5.23 (s, 1H: H1'), 5.15 (s, 1 H: H1'''), 4.38 (s, 1 H: H3''), 4.31 (s, 1 H: H1'''), 4.23 (s, 1 H: H2''), 4.17 (s, 1 H: H5'''), 4.05-4.10 (m, 2 H: H3''', H4''), 3.95 (t, *J* = 10.3 Hz, 1 H: H3'), 3.86 (t, *J* = 9.5 Hz, 1 H: H4), 3.69-3.84 (m, 6 H: H6''', H5''', H4''', H5'', H5, H6'''), 3.68 (s, 1 H: H4''), 3.56-3.67 (m, 4 H: H5'', H6', H5, H4', H6'), 3.50-3.57 (m, 3 H: H5', H3''', H6), 3.45 (s, 1 H: H2'''), 3.32-3.40 (m, 3 H: H2''', H3, H2'), 3.27-3.30 (br s, 1 H: H6'''), 3.18-3.25 (m, 2 H: H1, H6''), 2.34 (m, 1 H: H2<sub>eq</sub>), 1.68 (m, 1 H: H2<sub>ax</sub>). <sup>13</sup>C NMR (151 MHz, CDCl<sub>3</sub>) δ 109.97 (C1'), 102.82 (C1'''), 95.31 (C1''), 95.18 (C1'), 84.24 (C5), 81.21 (C4'), 77.27 (C4), 77.19 (C4'), 75.39 (C5'), 75.06 (C3''), 73.33 (C2''), 72.94 (C5'''), 72.39 (C6), 72.22 (C3'''), 68.22 (C2'''), 70.11 (C5''), 68.41 (C4'''), 67.58 (C3'), 67.55 (C3''), 67.19 (C4''), 61.06 (C6'), 60.03 (C5''), 59.39 (C6'''), 53.22 (C2'), 50.73 (C2''), 49.63 (C1), 48.66 (C3), 40.31 (C6''), 28.19 (C2), 21.83 (CH<sub>3</sub>). HRESIMS calcd for C<sub>29</sub>H<sub>56</sub>N<sub>5</sub>O<sub>19</sub> [M+H]<sup>+</sup>, 778.3570; found, 778.3588.

**4'-O-(4''''-Amino-4''''-deoxy-α-D-glucopyranosyl) paramomycin (27α).** Compound **27α** (20 mg, 64%) was obtained as a white solid by hydrogenolysis of **23α** (54 mg) after Sephadex chromatography.  $[\alpha]_D^{RT} +53.8$  (c 0.40, H<sub>2</sub>O); <sup>1</sup>H NMR (600 MHz, CDCl<sub>3</sub>) δ 5.63 (s, 1 H: H1<sub>L</sub>), 5.32 (s, 1H: H1'''), 5.19 (s, 1 H: H1''), 5.11 (s, 1 H: H1'''), 4.34 (t, *J* = 5.5 Hz, 1 H: H3''), 4.21 (s, 1 H: H2''), 4.12 (br s, 1 H: H5'''), 4.01-4.07 (m, 3 H: H3''', H3', H4''), 3.79-3.84 (m, 2 H: H5''', H4), 3.68-3.77 (m, 5 H: H5'', H4, H6''', H6', H3'''), 3.57-3.66 (m, 6 H: H5'', H6', H6''', H4', H4''', H5), 3.49-3.54 (m, 2 H: H2''', H6), 3.41 (s, 1 H: H2''), 3.30-3.39 (m, 2 H: H3, H2'), 3.24 (dd, *J* = 6.6 Hz, 13.9 Hz, 1 H: H6''), 3.15-3.20 (m, 2 H: H1, H6''), 3.07 (t, *J* = 10.6 Hz, 1 H: H4'''), 3.13 (dt, *J* = 3.6 Hz, 10.1 Hz, 1 H: H1), 2.29 (m, 1 H: H2<sub>eq</sub>), 1.66 (m, 1 H: H2<sub>ax</sub>). <sup>13</sup>C NMR (151 MHz, CDCl<sub>3</sub>) δ 110.03 (C1'), 99.66 (C1'''), 95.29 (C1''), 95.25 (C1'), 84.24 (C5), 81.20 (C4'), 77.18 (C4), 75.15 (C3''), 75.13 (C4'), 73.31 (C2''), 72.68 (C5'), 72.20 (C2'''), 71.22

(C6), 70.10 (C5'''), 69.03 (C5'''), 68.93 (C3'''), 68.81 (C3'), 67.53 (C3'''), 67.18 (C4'''), 60.24 (C6'), 59.94 (C5''), 59.89 (C6'''), 53.31 (C2'), 52.08 (C4'''), 50.73 (C2'''), 49.63 (C1), 48.61 (C3), 40.30 (C6'''), 28.15 (C2), 21.74 (CH<sub>3</sub>). HRESIMS calcd for C<sub>29</sub>H<sub>57</sub>N<sub>6</sub>O<sub>18</sub> [M+H]<sup>+</sup>, 777.3729; found, 777.3718.

**4'-O-(4'''-Amino-4'''-deoxy-β-D-glucopyranosyl) paramomycin (27β).** Compound **27β** (5 mg, 29%) was obtained as a white solid by hydrogenolysis of **23β** (22 mg) after Sephadex chromatography.  $[\alpha]_D^{RT} +66.86$  (c 0.17, H<sub>2</sub>O); <sup>1</sup>H NMR (600 MHz, CDCl<sub>3</sub>) δ 5.66 (s, 1 H: H1'), 5.25 (s, 1 H: H1''), 5.16 (s, 1H: H1'''), 4.42-4.47 (m, 2 H: H1''', H3''), 4.24 (s, 1 H: H2''), 4.17 (s, 1 H: H5'''), 4.07-4.10 (m, 2 H: H3''', H4''), 3.94 (br s, 1 H: H3'), 3.88 (br s, 1 H: H4), 3.73-3.84 (m, 7 H: H5', H5, H5'', H6', H6''', H6''', H6'), 3.69 (s, 1 H: H4'''), 3.59-3.66 (m, 3 H: H5''', H4', H5''), 3.54-3.58 (m, 2 H: H3''', H6), 3.46 (s, 1 H: H2'''), 3.40 (br s, 1 H: H3) 3.35 (br s, 1H: H2'), 3.15-3.31 (m, 4 H: H6''', H2''', H6''', H1), 3.12 (t, *J* = 10.6 Hz, 1 H: H4'''), 3.13 (dt, *J* = 3.6 Hz, 10.1 Hz, 1 H: H1), 2.33 (m, 1 H: H2<sub>eq</sub>), 1.70 (m, 1 H: H2<sub>ax</sub>). <sup>13</sup>C NMR (151 MHz, CDCl<sub>3</sub>) δ 110.01 (C1'), 102.45 (C1'''), 95.42 (C1'''), 95.35 (C1'), 84.27 (C5), 81.20 (C4''), 77.50 (C4), 77.36 (C4'), 75.26 (C3''), 73.44 (C2'''), 73.42 (C2''), 72.98 (C5'), 72.28 (C5'''), 72.22 (C3'''), 71.74 (C6), 70.19 (C5'''), 67.59 (C3'), 67.56 (C3'''), 67.28 (C4'''), 60.32 (C6'), 60.03 (C5''), 59.37 (C6'''), 53.38 (C2'), 52.18 (C4'''), 50.84 (C2'''), 49.70 (C1), 48.75 (C3), 40.40 (C6'''), 28.22 (C2), 21.47 (CH<sub>3</sub>). HRESIMS calcd for C<sub>29</sub>H<sub>57</sub>N<sub>6</sub>O<sub>18</sub> [M+H]<sup>+</sup>, 777.3729; found, 777.3704.

**Phenylthiomethyl 2,3-di-O-benzyl-4,6-O-benzylidene-α-D-glucopyranoside (29).** To a stirred solution of 2,3-di-O-benzyl-4,6-O-benzylidene-D-glucopyranosyl trichloroacetimidate **28**<sup>2</sup> (628 mg, 1.06 mmol, α:β = 4:1) and phenylthiomethanol<sup>3</sup> (163 mg, 1.17 mmol) in dichloromethane/diethyl ether (1:1, v/v; 7 mL) was added TMSOTf (21 μL, 26 μmol) at -78 °C under argon atmosphere. After 2 h of stirring at -78 °C, triethylamine (20 μL) was added and the reaction mixture was warmed to room temperature. The solution was diluted with dichloromethane (10 mL), washed with water (1 × 10 mL), sat. NaHCO<sub>3</sub> (1 × 10 mL), and brine (1 × 10 mL), then dried over MgSO<sub>4</sub>. After concentration of the filtrate under reduced pressure, the residue was purified by Flash chromatography (eluent: 0.5% triethylamine in hexane:ethyl acetate from 9:1 to 6:1) to afford **29** (460 mg, 76%).  $[\alpha]_D^{23} +77.4$  (c 1.25, CH<sub>2</sub>Cl<sub>2</sub>). <sup>1</sup>H NMR (500

MHz, CDCl<sub>3</sub>)  $\delta$  7.58 – 7.48 (m, 4H), 7.44 – 7.36 (m, 5H), 7.35 – 7.18 (m, 11H), 5.58 (s, 1H: PhCHO<sub>2</sub>), 5.44 (d,  $J$  = 3.9 Hz, 1H: H1), 5.15 (dd,  $J$  = 59.5, 12.2 Hz, 2H: PhSCH<sub>2</sub>O-C1), 4.90 (dd,  $J$  = 39.5, 11.4 Hz, 2H: PhCH<sub>2</sub>O-C2), 4.71 (dd,  $J$  = 32.6, 11.4 Hz, 2H: PhCH<sub>2</sub>O-C3), 4.27 (dd,  $J$  = 10.2, 4.8 Hz, 1H: H6a), 4.08 (t,  $J$  = 9.3 Hz, 1H: H3), 3.87 (td,  $J$  = 10.0, 4.8 Hz, 1H: H5), 3.77 – 3.63 (m, 3H: H6b, H2, H4). <sup>13</sup>C NMR (125 MHz, CDCl<sub>3</sub>)  $\delta$  138.74, 137.92, 137.35, 135.44, 130.06, 129.03, 128.94, 128.31, 128.28, 128.23, 128.05, 127.97, 127.94, 127.87, 127.71, 127.56, 126.90, 126.03, 101.29 (PhCHO<sub>2</sub>), 93.86 (C1), 81.99 (C4), 78.79 (C3), 78.55 (C2), 75.26 (PhCH<sub>2</sub>O-C2), 73.24 (PhCH<sub>2</sub>O-C3), 71.56 (PhSCH<sub>2</sub>O-C1), 68.89 (C6), 63.17 (C5). HRESIMS  $m/z$  calcd for C<sub>34</sub>H<sub>34</sub>O<sub>6</sub>SN<sub>5</sub>Na [M+Na]<sup>+</sup> 593.1974, found 593.1973.

**4'-O-(2,3-Di-O-benzyl-4,6-benzylidene- $\alpha$ -D-glucopyranosyloxymethyl)-1,3,2',2'',6'''-**

**pentaazido-6,3',6',2'',5'',3''',4'''-hepta-O-benzyl-1,3,2',2'',6'''-pentadeamino-paromomycin**

**(30).** To a solution of **11**<sup>1</sup> (111 mg, 194  $\mu$ mol) and **29** (77.8 mg, 56.5  $\mu$ mol) in dry dichloromethane (1 mL) were added *N*-iodosuccinimide (44.2 mg, 196  $\mu$ mol) and trifluoromethanesulfonic acid (3.4  $\mu$ L, 38  $\mu$ mol) at –30 °C under argon atmosphere. After 2 h of stirring at –30 °C, sat. NaHCO<sub>3</sub> (2.5 mL) was added and warmed to room temperature. The reaction mixture was diluted with dichloromethane (4 mL) and the organic layer was separated, which was washed with sat. Na<sub>2</sub>S<sub>2</sub>O<sub>3</sub> (1  $\times$  5 mL) and brine (1  $\times$  5 mL), then dried over MgSO<sub>4</sub>. After concentration of the filtrate under reduced pressure, the residue was purified by flash chromatography (eluent: toluene:ethyl acetate = 25:1) to afford **30** (34.6 mg, 33%). [ $\alpha$ ]<sub>D</sub><sup>23</sup> +66.7 (c 1.14, CHCl<sub>3</sub>). <sup>1</sup>H NMR (600 MHz, CDCl<sub>3</sub>)  $\delta$  7.71 – 7.11 (m, 50H), 6.17 (d,  $J$  = 3.7 Hz, 1H: H1'), 5.67 (d,  $J$  = 5.8 Hz, 1H: H1''), 5.56 (s, 1H: PhCHO<sub>2</sub>), 5.14 (d,  $J$  = 3.7 Hz, 1H: H1'''), 5.03 (d,  $J$  = 5.8 Hz, 1H: OCH<sub>2</sub>O), 4.98 (d,  $J$  = 10.7 Hz, 1H: PhCH<sub>2</sub>-C6), 4.95 – 4.81 (m, 4H: PhCH<sub>2</sub>-C3''', H1''', PhCH<sub>2</sub>-C3', OCH<sub>2</sub>O), 4.81 – 4.74 (m, 3H: PhCH<sub>2</sub>-C3''', PhCH<sub>2</sub>-C2''', PhCH<sub>2</sub>-C3'), 4.74 – 4.67 (m, 2H: PhCH<sub>2</sub>-C2''', PhCH<sub>2</sub>-C6), 4.67 – 4.50 (m, 5H: PhCH<sub>2</sub>-C4''', PhCH<sub>2</sub>-C2'', PhCH<sub>2</sub>-C6', PhCH<sub>2</sub>-C5''), 4.50 – 4.40 (m, 3H: PhCH<sub>2</sub>-C2'', PhCH<sub>2</sub>-C5'', PhCH<sub>2</sub>-C3'''), 4.37 – 4.23 (m, 4H: PhCH<sub>2</sub>-C3''', H4'', PhCH<sub>2</sub>-C4''', H3''), 4.23 – 4.15 (m, 2H: H6a''', H5'), 4.10 – 4.00 (m, 2H: H3', H3'''), 4.00 – 3.88 (m, 3H: H2'', H5, H6a'), 3.88 – 3.75 (m, 5H: H6b', H5''', H5a'', H3'', H5''), 3.75 – 3.66 (m, 2H: H4, H6b'''), 3.66 – 3.52 (m, 5H: H4''', H6a''', H5b'', H2''', H4'), 3.51 – 3.38 (m, 2H: H3, H1), 3.36 (t,  $J$  = 2.5 Hz, 1H: H2'''), 3.23 (t,  $J$  = 9.4 Hz, 1H: H6), 3.14 (d,  $J$  =

2.6 Hz, 1H: H4'''), 3.03 (dd,  $J = 10.3, 3.7$  Hz, 1H: H2'), 2.92 (dd,  $J = 13.0, 4.2$  Hz, 1H: H6b'''), 2.21 (dt,  $J = 13.3, 4.6$  Hz, 1H: H2<sub>eq</sub>), 1.31 (q,  $J = 12.7$  Hz, 1H: H2<sub>ax</sub>). <sup>13</sup>C NMR (151 MHz, CDCl<sub>3</sub>)  $\delta$  138.66, 138.64, 138.23, 138.06, 138.00, 137.96, 137.59, 137.41, 137.05, 136.99, 128.92, 128.69, 128.55, 128.51, 128.46, 128.42, 128.39, 128.38, 128.36, 128.33, 128.29, 128.25, 128.21, 128.18, 127.98, 127.95, 127.90, 127.84, 127.78, 127.72, 127.57, 127.53, 127.51, 127.48, 127.45, 126.07, 115.90, 106.07 (C1''), 101.30 (PhCHO<sub>2</sub>), 98.69 (C1'''), 95.85 (C1'), 95.35 (C1'''), 93.65 (OCH<sub>2</sub>O), 84.14 (C6), 82.34 (C2''), 82.15 (C4'''), 82.01 (C4''), 81.89 (C5), 79.90 (C3'), 78.79 (C2'''), 78.38 (C3'''), 77.51 (C4'), 75.59 (C3''), 75.20 (PhCH<sub>2</sub>-C3'), 75.11 (PhCH<sub>2</sub>-C3'''), 75.06 (PhCH<sub>2</sub>-C6), 74.68 (C4), 74.24 (C5'''), 73.35 (PhCH<sub>2</sub>-C2'''), 73.30 (PhCH<sub>2</sub>-C2''), 73.26 (PhCH<sub>2</sub>-C5''), 72.95 (C3''', PhCH<sub>2</sub>-C6'), 72.40 (PhCH<sub>2</sub>-C3'''), 71.76 (PhCH<sub>2</sub>-C4'''), 71.50 (C4'''), 70.81 (C5'), 70.07 (C5''), 69.09 (C6'), 68.93 (C6'''), 63.03 (C2'), 62.98 (C5'''), 60.40 (C1), 60.21 (C3), 57.32 (C2'''), 51.02 (C6'''), 32.59 (C2). HRESIMS  $m/z$  calcd for C<sub>100</sub>H<sub>105</sub>N<sub>15</sub>O<sub>20</sub>Na [M+Na]<sup>+</sup> 1858.7558, found 1858.7540.

**4'-O-( $\alpha$ -D-Glucopyranosyloxymethyl) paromomycin (32).** To a stirred solution of **30** (34.6 mg, 18.8  $\mu$ mol) in THF (2.2 mL) and 0.1 M NaOH (0.4 mL) was added a solution of 1 M trimethylphosphine in THF (107  $\mu$ L, 107  $\mu$ mol) at room temperature. After 6 h of stirring at 50 °C, the reaction mixture was concentrated under reduced pressure and the residue was purified by Flash chromatography (eluent: CHCl<sub>3</sub>:2-propanol:25% ammonia = 5:3:0.2). The resulting product (34.2 mg) was dissolved in a solution of methanol (0.5 mL), water (1 mL), and acetic acid (0.15 mL), and 20% Pd(OH)<sub>2</sub>/C (80.5 mg) was added. After 19 h of stirring under H<sub>2</sub> atmosphere (48 psi) at room temperature, the reaction mixture was filtered through Celite, neutralized with Amberlite IRA-400 (OH<sup>-</sup> form), and concentrated under reduced pressure. The crude product was purified through a Sephadex C-25 ion exchange column (stepwise elution using water, 0.125% ammonia, and 0.375% ammonia) to afford **32** (4.1 mg, 27%), which was followed by titration with acetic acid in water and lyophilized *in vacuo* to give the corresponding pentaacetate salt (4.4 mg, 21%). [ $\alpha$ ]<sub>D</sub><sup>23</sup>+78.2 (c 0.29, H<sub>2</sub>O). <sup>1</sup>H NMR (600 MHz, D<sub>2</sub>O)  $\delta$  5.59 (d,  $J = 3.9$  Hz, 1H: H1'), 5.20 (d,  $J = 2.4$  Hz, 1H: H1''), 5.12 (d,  $J = 1.8$  Hz, 1H: H1'''), 5.02 (d,  $J = 3.8$  Hz, 1H: H1'''), 4.90 (dd,  $J = 10.9, 6.9$  Hz, 2H: OCH<sub>2</sub>O), 4.36 (dd,  $J = 6.9, 4.9$  Hz, 1H: H3''), 4.21 (dd,  $J = 5.0, 2.4$  Hz, 1H: H2''), 4.14 (ddd,  $J = 6.4, 4.0, 1.5$  Hz, 1H: H5'''), 4.06 (t,  $J = 3.1$  Hz,

1H: H3'''), 4.03 (ddd,  $J = 7.2, 4.5, 3.0$  Hz, 1H: H4''), 3.91 (dd,  $J = 10.4, 8.7$  Hz, 1H: H3'), 3.77 – 3.46 (m, 14H: H5a'', H5', H4, H5, H6', H4''', H6''', H5b'', H4', H5''', H3''', H6), 3.44 (dd,  $J = 9.9, 3.8$  Hz, 1H: H2'''), 3.41 (dt,  $J = 3.0, 1.3$  Hz, 1H: H2'''), 3.30 – 3.16 (m, 5H: H2', H6a''', H4''', H6b''', H3), 3.13 (ddd,  $J = 12.7, 10.5, 4.3$  Hz, 1H: H1), 2.22 (dt,  $J = 12.8, 4.4$  Hz, 1H: H2<sub>eq</sub>), 1.75 (s, 15H: CH<sub>3</sub>COOH), 1.56 (q,  $J = 12.6$  Hz, 1H: H2<sub>ax</sub>). <sup>13</sup>C NMR (151 MHz, D<sub>2</sub>O)  $\delta$  180.98 (CH<sub>3</sub>COOH), 109.96 (C1''), 95.61 (C1'), 95.39 (C1'''), 95.35 (C1'''), 92.31 (OCH<sub>2</sub>O), 84.49 (C5), 81.17 (C4'), 78.64 (C4), 75.76 (C4'), 75.10 (C3''), 73.33 (C2''), 72.81 (C5'''), 72.74 (C5'), 72.64 (C6), 72.33 (C3'''), 70.81 (C2'''), 70.19 (C5'''), 69.35 (C4'''), 68.96 (C3'), 67.62 (C3'''), 67.23 (C4'''), 60.41 (C6'''), 60.03 (C5''), 59.95 (C6'), 53.62 (C2'), 50.81 (C2'''), 49.91 (C1), 48.82 (C3), 40.35 (C6'''), 29.38 (C2), 23.05 (CH<sub>3</sub>COOH). HRESIMS  $m/z$  calcd for C<sub>30</sub>H<sub>58</sub>N<sub>5</sub>O<sub>20</sub> [M+H]<sup>+</sup> 808.3675, found 808.3674.



## References

- (1) Pathak, R.; Perez-Fernandez, D.; Nandurdikar, R.; Kalapala, S. K.; Böttger, E. C.; Vasella, A. *Helv. Chim. Acta* **2008**, *91*, 1533-1552.
- (2) Waldmann, H.; Böhm, G.; Schmid, U.; Röttele, H. *Angew. Chem. Int. Ed.* **1994**, *33*, 1944-1946.
- (3) Gundersen, L. L.; Benneche, T. *Acta Chem. Scand.* **1991**, *45*, 975-977.
